# Supplementary material
Source: PubMed Central journal article supplement (PMC7219381)
Supplement: mmc1.pdf [file mmc1.pdf]

**Suspicion:** Fever > 38°C  
 Dry cough  
 Shortness of breath  
 Polypnea, RR > 22/min

**COVID-19 test :** RT- PCR test

**Patient:** Surgical face mask + hand hygiene  
**Evaluation by senior staff**

**Severe symptoms (WHO) :** Fever and one of the following signs:

- SaO<sub>2</sub> < 94% in room air
- Respiratory distress
- RR > 30/min

**= Refer to the appropriate obstetric unit**

Perform COVID-19 test as soon as possible

## Vaginal delivery

- ✓ Dedicated delivery room (preferably negative pressure isolated room)
- ✓ Dedicated trays and trolleys (COVID Kits with common supplies and drugs) to minimize traffic and contamination.
- ✓ Dedicated team/ with minimum number of care givers
- ✓ Personal Protective Equipment (PPE)
- ✓ Check the platelet count
- ✓ Neuraxial anesthesia not contraindicated by fever
- ✓ Discuss the presence of partner (PPE)
- ✓ Discuss post partum NSAIDs

## Caesarean delivery

- ✓ Neuraxial anesthesia not contraindicated by fever
- ✓ Dedicated team/ with minimum number of care givers
- ✓ Dedicated trays and trolleys (COVID Kits with common supplies and drugs) to minimize traffic.
- ✓ PPE on a trolley located outside the operating room
- ✓ Assign a dedicated circulating helping staff
- ✓ Cleaning protocol of the room by hygiene staff
- ✓ Postoperative care in the operative room or in a dedicated recovery area
- ✓ Discuss NSAIDs
- ✓ Avoid dexamethasone for prevention of PONV
- ✓ Breastfeeding not contraindicated
- ✓ Surgical mask during mother – baby interactions

## In case of GA in delivery room

- ✓ Senior anesthetist with PPE
- ✓ Preoxygenation with a sealed face mask
- ✓ Rapid sequence induction
- ✓ Videolaryngoscopy preferred
- ✓ Avoid nebulization of expiratory gazes

## Personal Protective Equipment (PPE)

- ✓ FFP2 mask for airway management
- ✓ Face shield
- ✓ Gloves (sterile if indicated)
- ✓ Reinforced gown

Any high risk obstetric patient infected with COVID-19 need to be assessed by multidisciplinary team and transferred to a unit where an adulte and neonatal ICU are available if appropriate.

CNGOF recommendations

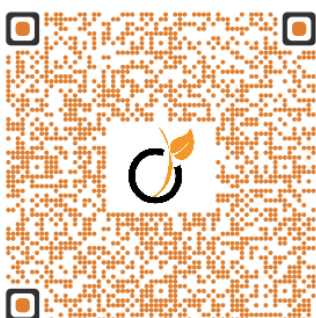

SFAR recommendations

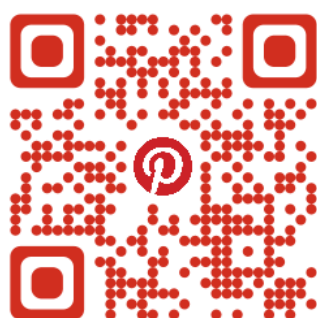

OTI video SRLF

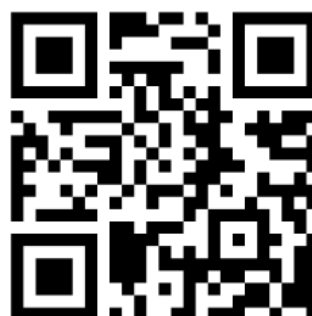

MW Council recommendations

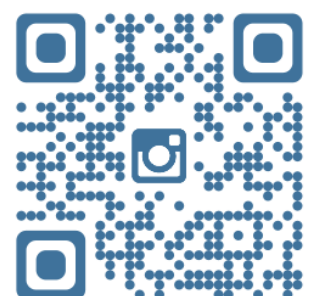

Place your phone's camera in front of the code to access the documents
